# Supplementary material for: Phosphorus Cycling in Montreal’s Food and Urban Agriculture Systems
Source: PLoS One. 2015 Mar 31;10(3):e0120726. doi: 10.1371/journal.pone.0120726 (PMC4380336; doi:10.1371/journal.pone.0120726)
Supplement: S1 Table — (XLSX) [file pone.0120726.s002.xlsx]

## Sheet: full set
type of UA	id	number of gardens	reference year	Length of growing season	total area m2	area on soil	area in containers	area on roof	area in hydro	area other	total area cultivated (m2)	% of area in sol	% of area in containers	amount of P (kg)	used potting mix	amount of P (kg)	used fertilized potting mix	amount of P (kg)	used black earth	amount of P (kg)	used peat	amount of P (kg)	used perlite	amount of P (kg)	used vermiculite	amount of P (kg)	used cocofibre	amount of P (kg)	used marine based compost	amount of P (kg)	used bio-forest compost	amount of P (kg)	used green-waste compost	amount of P (kg)	used other type of compost	amount of P (kg)	used sheep/goat manure	amount of P (kg)	used cow manure	amount of P (kg)	used chicken manure	amount of P (kg)	used mixed manure	amount of P	used other manure	amount of P (kg)	used solid chem fertilizer	amount of P (kg)	used liquid fertilizer
collective	4	12	2012	21	4900	4832.64	67.36				4410	0.986253	0.0137469												1			2.10536	1				1	10.7145	1					1.70196	1	3.33919	1
collective	30	4	2012	26	719.5	700	19.5				683.525	0.972898	0.0271022		1																	8.0082	1							0.39276	1								1
collective	31	2	2012	20	402.27	77.1095	325.161				402.27	0.191686	0.808314	0	1						1		1		1			5.2068	1			1.665	1	8.6825	1						1
collective	34	5	2012	23	100	87.5	12				100	0.879397	0.120603		1		1											1.17828	1			49.4347	1	0.069	1	0.314208	1	0.314208	1	2.81478	1
collective	38	3	2012	13	11.1484	11.1484	0				11.1484	1	0		1																					0.305724	1
collective	39	1	2012	17	153.29	153.29	0				153.29	1	0															5.37885	1						1
collective	57	1	2012	20	5.57	5.57	0				5.57	1	0
private	58	1	2012	20	3.34	3.34	0				3.34	1	0
collective	60	1	2013	11	1.617	1.617	0				1.617	1	0		1						1											0.080082	1
collective	61	1	2013	19	960	960	0				960	1	0		1	0.0235656	1								1			7.59118	1			0.816361	1							0.26184	1
buisness	64	1	2012	23	148.645	0	0	74.3224		74.3224	96.6191	0	1		1																	0.192197	1							0.17456	1
buisness	65	1	2012	19	167.22	0	167.22				167.22	0	1		1										1			1.3583	1											0.0471312	1
private	66	1	2012	18	41.2	40	1.2				41.2	0.970874	0.0291262															0.203744	1			0.0440451	1
collective	68	1	2013	48	68.66	61.02	3.18			4.46	68.66	0.950467	0.0495327		1													0.6546	1							0.04364	1				1								1
collective	70	1	2012	23	167.28	167.28					167.28	1	0																			12.8532	1
buisness	76	1	2013	21	13.23	0	13.73				13.23	0	1		1										1		1	1.26774	1						1					2.82787	1
buisness	79	1	2012	22	1858.06	1858.06	0				1858.06	1	0																									27.8205	1							0.52368
collective	80	1	2013	16	30	0	30				30	0	1																							0.153176	1
collective	81	1	2013	15	216	216	0				216	1	0						1									0.22911	1				1		1							0.0218375	1
collective	84	1	2013		5	0	5				5	0	1															0.22911	1			0.0384394	1		1					0.026184	1
collective	87	1	2013	21	15.16	0	15.16				15.16	0	1						1													0.00122454	1					1.11217	1
collective	89	8	2013	20	587	573	4			10	587	0.993068	0.00693241		1													6.49084	1	1.30918	1		1							0.13092	1			6.0005	1
collective	90	14	2013	23	1069	1069	0				1069	1	0															0.572775	1	0.30548	1	1.44148	1			0.706968	1			0.6546	1	3.46441	1
collective	93	2	2013	14	43	0	43				38.7	0	1						1									1.22192	1			0.0864072	1							0.13092	1
collective	94	6	2013	18	390.98	389.3	1.68				390.98	0.995703	0.00429689		1	0.00600486	1																			0.2182	1			0.301116	1					1.01978	1
collective	95	3	2013	27	740	410	330				740	0.554054	0.445946																			5.61248	1
collective	96	3	2013	16	87.48	78.84	8.64				87.48	0.901235	0.0987654						1									0.267295	1			3.01116	1			0.15274	1			0.0178051	1
collective	97	1	2013	17	20	20	0				10	1	0						1													0.0136078	1
collective	98	1	2013	17	16.68	0	16.68				16.68	0	1						1										1				1
collective	99	14	2012	23	4564.35	4050	17.23			500	3651.48	0.995764	0.0042363		1																	10.2185	1			0.873498	1		1	1.9638	1
collective	102	1	2013	22	72.265	72.265	0				72.265	1	0	0.519316	1				1									1.64196	1
collective	103	1	2013	16	17.55	0	17.55				17.55	0	1	1.00808	1													1.64196	1
collective	104	1	2013	20	43	43	0				43	1	0						1									0.513206	1
collective	105	1	2013	21	5.8	3.4	2.4				5.8	0.586207	0.413793	0.507097	1
collective	106	1	2013		29.7	29.7	0				29.7	1	0	0.281478	1				1																					0.06546	1						1
collective	107	1	2013	21	12.57	0	12.57				12.57	0	1															0.122192	1
buisness	108	210	2013	28	630	630	0				630	1	0			46.7321	1																	69	1
collective	109	1	2013	18	195.69	195.69	0				195.69	1	0				1						1		1							1.10031	1
collective	110	8	2012	12	270	215	55				270	0.796296	0.203704		1				1				1		1							30	1	0.0345	1
collective	111	9	2013	27	49.55	13.94	29.3	6.31			34.685	0.281332	0.718668		1				1				1		1			0.195594	1			0.00960984	1			0.131025	1									0.069824	1
collective	112	9	2013	20	460	400	60				404.8	0.869565	0.130435	0.0461941	1				1									0.259623	1	11.1215	1	0.0306135	1							0.0166826	1
community	116	1	2013	20	9	9	0				9	1	0																			0.160164	1			0.0818905	1
collective	117	220	2013	13	4482	4454	28.3				4257.9	0.993686	0.00631372		1													35.859	1																	1.6365	1
buisness	118	1	2013	23	63.3	63.3	0				63.3	1	0		1				1									0.122737	1			1.22454	1							0.6546	1	1.11306	1				1
buisness	119	1	2013	19	98.76	0	98.76				98.76	0	1																	2.182	1																	1.39648	1
collective	120	1	2013	20	20.89		20.89				20.89	0	1		1													0.7637	1
collective	10	1	2012	12	23	21	2				23	0.913043	0.0869565		1																	0.18	1
collective	12	2	2013	16	230	60	170				230	0.26087	0.73913						1			0.00011521	1										1
community	13	1	2012	22	17.8374	17.8374					17.8374	1	0		1				1									0.0814977	1							0.0471312	1												1
private	20	1	2013	17	21.15	20.15	1				21.15	0.952719	0.0472813		1				1													0.174899	1			0.0471312	1
collective	19	1	2013	14	1.77	0	1.77				1.77	0	1		1							1.1521e-05	1					0.0633871	1			0.288295	1
private	23	1	2013	19	0.743224		0.743224				0.743224	0	1						1													0.0240246	1
collective/ university	25	1	2013	22	557.418	557.418					557.418	1	0																			48.0492	1							0.13092	1
private	91	1	2013	17	2.076	0	2.076				2.076	0	1						1													0.707284	1
community	92	1	2013	21	18.58	18.58	0				18.58	1	0															0.06546	1			0.369979	1													0.0078552	1
community	93	1	201	21	18.58	18.58	0				18.58	1	0															0.13092	1													0.0471312	1
community	95	1	2013	15	18.58	18.58	0				18.58	1	0															0.19638	1				1
community	96	1	2013	25	16	16	0				16	1	0																			0.320328	1			0.0079179	1
community	97	1	2013	21	18	18	0				18	1	0								1															0.131025	1									0.0237402	1
community	98	1	2013	25	18	18	0				16.2	1	0																			0.22423	1							0.052368	1
community	101	1	2013	21	18	18	0				18	1	0																							0.101908	1
community	102	1	2013	21	15.4	15.4	0				15.4	1	0		1													0.0679277	1
community	103	1	2013	19	15.4	15.4	0				15.4	1	0																			0.587268	1			0.22911	1										1		1
community	104	1	2013	15	17.9	17.9	0				17.9	1	0
community	105	1	2013	21	9	9	0				9	1	0																			0.734085	1			0.026184	1
private	106	1	2013	17	1.34709	0	1.34709				1.34709	0	1						1															0.01035	1
community	12	1	2013	23	4.22	0	4.22				4.22	0	1															0.0760645	1			6.19289e-05	1							0.016365	1
community	13	1	2013	24	4.22	0	4.22				4.22	0	1						1																					0.003273	1
community	14	1	2013	24	4.22	0	4.22				4.22	0	1						1																					0.003273	1
community	15	1	2013	19	18	18	0				18	1	0			0.0205728	1											0.0227291	1
private	16	1	2013	19	34.74	34.74	0				34.74	1	0																							0.142522	1									0.0087282	1
community	17	1	2013	19	8.69	8.69	0				8.69	1	0															0.0981884	1
community	18	1	2013	17	18	18	0				18	1	0															0.0653727	1											0.17456	1
community	19	1	2013	20	18	18	0				18	1	0																							0.0873498	1			0.0052368	1
community	20	1	2013	17	18	18	0				18	1	0				1		1			1.3092e-05	1
community/ buisness	21	1	2013	17	172.8	172.8	0				172.8	1	0	0.282787	1													1.91471	1																			0.0453866	1
private	22	1	2013	17	4.92	4.92	0				4.92	1	0
community	23	1	2013	21	18	18	0				18	1	0															0.0814977	1			0.0960984	1		1					0.26184	1
private	24	1	2013	24	2.57	2.34	0.23				2.57	0.910506	0.0894942		1				1																	0.06546	1
private	25	1	2013	24	7.4	5.88	1.52				7.4	0.794595	0.205405																							0.06546	1
private	26	1	2013	23	1.97	0	1.97				1.97	0	1																							0.0436749	1
private	27	1	2013	26	2.5	2.5	0				2.5	1	0		1				1													1.28131	1													0.0178055	1
private	28	1	2013	20	11.2	11.2	0				11.2	1	0																			0.0640656	1			0.06546	1
private	32	1	2013	no end date yet	15	5	10				3.75	0.333333	0.666667		1																							0.0363667	1
community	38	1	2013	15	9	9	0				9	1	0						1																	0.0655124	1
private	39	1	2013	20	5.34	4.08	1.26				5.34	0.764045	0.235955				1		1													0.480492	1
community	40	1	2013	20	18	18	0				18	1	0																									0.13092	1
community	41	1	2013	22	18.72	18.72	0				18.72	1	0															0.244493	1
private	42	1	2013	18	25.26	25.26	0				25.26	1	0																			0.480492	1							0.0178051	1
community	43	1	2013	18	9	9	0				9	1	0						1																													0.0890276	1
private	44	1	2013	20	17.89	17.89	0				17.89	1	0															0.0245475	1																	0.00654615	1
community	45	1	2013	21	36	36	0				36	1	0															0.0814977	1											0.009819	1
community	46	1	2013	22	18	18	0				18	1	0															0.038185	1			1.60164	1
community	47	1	2013	21	18	18	0				18	1	0						1									0.026184	1
community	49	1	2013	16	18	18	0				18	1	0																	0.17456	1					0.0436749	1									0.0261846	1
community	50	1	2013	17	18	18	0				18	1	0																	0.17456	1
community	51	3	2012	18	60	60	0				60	1	0																	0.08728	1					1.31025	1
private	52	1	2013	15	27.36	27.36	0				27.36	1	0																							0.0655124	1
community	53	1	2013	15	18	18	0				18	1	0																	0.17456	1
private	54	1	2013	17	151.19	151.19	0				151.19	1	0																			8.15235	1
private	56	1	2013	18	5.5	0	5.5				5.5	0	1										1		1									0.207	1					0.26184	1
private	57	1	2013	16	2	0	2				2	0	1															0.0407489	1					0.207	1
private	58	1	2013	20	15.34	13.37	1.97				15.34	0.871578	0.128422						1													0.15616	1
collective	59	3	2013	19	63.44	63.44	0				63.44	1	0						1
private	63	1	2013	18	16.78	16.78	0				16.78	1	0																			0.672689	1
private	64	1	2013	18	1.63	0.96	0.67				1.63	0.588957	0.411043			0.0235656	1		1
private	65	1	2013	12	30	30	0				30	1	0																			3.20328	1							0.009819	1
private	67	1	2013	18	6.12	6.12	0				6.12	1	0						1																	0.03273	1
private	68	1	2013		9	7	2				2.7	0.777778	0.222222
private	71	1	2013	21	13	13	0				13	1	0						1																											0.130923	1
private	72	1	2013	18	7.364	7.2	0.164				7.364	0.977729	0.0222705			0.0028366	1															0.081	1
private	75	1	2013	13	0.5109	0	0.510966				0.40872	0	1
private	76	1	2013	16	8.43	7	1.43				8.43	0.830368	0.169632		1	0.000837888	1		1													0.160164	1
private	77	1	2013	18	5.23	0	5.23				5.23	0	1						1													0.147351	1
community	79	1	2013	24	18.58	18.58	0				18.58	1	0														1
community	80	1	2013	12	18.58	18.58	0				18.58	1	0															0.104736	1					0.092	1	0.3273	1
community	81	1	2013	21	18.58	18.58	0				18.58	1	0															0.026184	1			0.813633	1							0.00593068	1
community	82	1	2013	16	16.72	16.72	0				16.72	1	0																							0.054943							1
community	83	1	2013	14	16.72	16.72	0				16.72	1	0																							0.19638	1
community	84	1	2013	14	16.72	16.72	0				16.72	1	0																							0.13092	1
community	85	1	2013	17	13.38	13.38	0				13.38	1	0															0.0814977	1							0.03273	1
community	86	1	2013	22	13.38	13.38	0				13.38	1	0			0.0314208	1																			0.026184	1			0.0178051	1	0.018222	1
community	87	1	2013	21	18	18	0				17.28	1	0						1																					0.00890256	1
community	88	1	2013	22	9	9	0				9	1	0																							0.078552	1			0.00890256	1
community	89	1	2013	20	18	18	0				18	1	0						1																	0.06546	1
private	5	1	2013	don't have end date	6.975	6.975	0				6.975	1	0														1									0.26184	1
community	6	1	2013	24	17.8374	17.8374	0				17.8374	1	0																			0.00960984	1
community	7	1	2013	19	16.92	16.92	0				16.92	1	0																																	0.00395895	1
community	8	1	2013	17	16.92	16.92	0				16.92	1	0																											0.039276	1
community	9	1	2013	21	16.92	16.92	0				16.92	1	0								1											0.192197	1									0.210129	1
community	10	1	2013	22	17.8374	17.8374	0				17.8374	1	0																			1.42845	1
community	11	1	2012	20	17.8374	17.8374	0				17.8374	1	0
collective	0	1	2013	21	10.57	0	10.57				10.57	0	1		1				1				1		1			1.3583	1				1
[truncated: 37 more columns]

## Sheet: Sheet1
type of UA	id	number of gardens	reference year	Length of growing season	total area m2	area on soil	area in containers	area on roof	area in hydro	area other	total area cultivated (m2)	fraction of area in sol	fraction of area in containers	amount of P (kg)	used potting mix	amount of P (kg)	used fertilized potting mix	amount of P (kg)	used black earth	amount of P (kg)	used peat	amount of P (kg)	used perlite	amount of P (kg)	used vermiculite	amount of P (kg)	used cocofibre	amount of P (kg)	used marine based compost	amount of P (kg)	used bio-forest compost	amount of P (kg)	used green-waste compost	amount of P (kg)	used other type of compost	amount of P (kg)	used sheep/goat manure	amount of P (kg)	used cow manure	amount of P (kg)	used chicken manure	amount of P (kg)	used mixed manure	amount of P	used other manure	amount of P (kg)	used solid chem fertilizer	amount of P (kg)	used liquid fertilizer
collective	4	12	2012	21	4900	4832.64	67.36				4410	0.986253	0.0137469												1			2.10536	1				1	10.7145	1					1.70196	1	3.33919	1
collective	30	4	2012	26	719.5	700	19.5				683.525	0.972898	0.0271022		1																	8.0082	1							0.39276	1								1
collective	31	2	2012	20	402.27	77.1095	325.161				402.27	0.191686	0.808314	0	1						1		1		1			5.2068	1			1.665	1	8.6825	1						1
collective	34	5	2012	23	100	87.5	12				100	0.879397	0.120603		1		1											1.17828	1			49.4347	1	0.069	1	0.314208	1	0.314208	1	2.81478	1
collective	38	3	2012	13	11.1484	11.1484	0				11.1484	1	0		1																					0.305724	1
collective	39	1	2012	17	153.29	153.29	0				153.29	1	0															5.37885	1						1
collective	57	1	2012	20	5.57	5.57	0				5.57	1	0
private	58	1	2012	20	3.34	3.34	0				3.34	1	0
collective	60	1	2013	11	1.617	1.617	0				1.617	1	0		1						1											0.080082	1
collective	61	1	2013	19	960	960	0				960	1	0		1	0.0235656	1								1			7.59118	1			0.816361	1							0.26184	1
buisness	64	1	2012	23	148.645	0	0	74.3224		74.3224	96.6191	0	1		1																	0.192197	1							0.17456	1
buisness	65	1	2012	19	167.22	0	167.22				167.22	0	1		1										1			1.3583	1											0.0471312	1
private	66	1	2012	18	41.2	40	1.2				41.2	0.970874	0.0291262															0.203744	1			0.0440451	1
collective	68	1	2013	48	68.66	61.02	3.18			4.46	68.66	0.950467	0.0495327		1													0.6546	1							0.04364	1				1								1
collective	70	1	2012	23	167.28	167.28					167.28	1	0																			12.8532	1
buisness	76	1	2013	21	13.23	0	13.73				13.23	0	1		1										1		1	1.26774	1						1					2.82787	1
buisness	79	1	2012	22	1858.06	1858.06	0				1858.06	1	0																									27.8205	1							0.52368
collective	80	1	2013	16	30	0	30				30	0	1																							0.153176	1
collective	81	1	2013	15	216	216	0				216	1	0						1									0.22911	1				1		1							0.0218375	1
collective	84	1	2013		5	0	5				5	0	1															0.22911	1			0.0384394	1		1					0.026184	1
collective	87	1	2013	21	15.16	0	15.16				15.16	0	1						1													0.00122454	1					1.11217	1
collective	89	8	2013	20	587	573	4			10	587	0.993068	0.00693241		1													6.49084	1	1.30918	1		1							0.13092	1			6.0005	1
collective	90	14	2013	23	1069	1069	0				1069	1	0															0.572775	1	0.30548	1	1.44148	1			0.706968	1			0.6546	1	3.46441	1
collective	93	2	2013	14	43	0	43				38.7	0	1						1									1.22192	1			0.0864072	1							0.13092	1
collective	94	6	2013	18	390.98	389.3	1.68				390.98	0.995703	0.00429689		1	0.00600486	1																			0.2182	1			0.301116	1					1.01978	1
collective	95	3	2013	27	740	410	330				740	0.554054	0.445946																			5.61248	1
collective	96	3	2013	16	87.48	78.84	8.64				87.48	0.901235	0.0987654						1									0.267295	1			3.01116	1			0.15274	1			0.0178051	1
collective	97	1	2013	17	20	20	0				10	1	0						1													0.0136078	1
collective	98	1	2013	17	16.68	0	16.68				16.68	0	1						1										1				1
collective	99	14	2012	23	4564.35	4050	17.23			500	3651.48	0.995764	0.0042363		1																	10.2185	1			0.873498	1		1	1.9638	1
collective	102	1	2013	22	72.265	72.265	0				72.265	1	0	0.519316	1				1									1.64196	1
collective	103	1	2013	16	17.55	0	17.55				17.55	0	1	1.00808	1													1.64196	1
collective	104	1	2013	20	43	43	0				43	1	0						1									0.513206	1
collective	105	1	2013	21	5.8	3.4	2.4				5.8	0.586207	0.413793	0.507097	1
collective	106	1	2013		29.7	29.7	0				29.7	1	0	0.281478	1				1																					0.06546	1						1
collective	107	1	2013	21	12.57	0	12.57				12.57	0	1															0.122192	1
buisness	108	210	2013	28	630	630	0				630	1	0			46.7321	1																	69	1
collective	109	1	2013	18	195.69	195.69	0				195.69	1	0				1						1		1							1.10031	1
collective	110	8	2012	12	270	215	55				270	0.796296	0.203704		1				1				1		1							30	1	0.0345	1
collective	111	9	2013	27	49.55	13.94	29.3	6.31			34.685	0.281332	0.718668		1				1				1		1			0.195594	1			0.00960984	1			0.131025	1									0.069824	1
collective	112	9	2013	20	460	400	60				404.8	0.869565	0.130435	0.0461941	1				1									0.259623	1	11.1215	1	0.0306135	1							0.0166826	1
community	116	1	2013	20	9	9	0				9	1	0																			0.160164	1			0.0818905	1
collective	117	220	2013	13	4482	4454	28.3				4257.9	0.993686	0.00631372		1													35.859	1																	1.6365	1
buisness	118	1	2013	23	63.3	63.3	0				63.3	1	0		1				1									0.122737	1			1.22454	1							0.6546	1	1.11306	1				1
buisness	119	1	2013	19	98.76	0	98.76				98.76	0	1																	2.182	1																	1.39648	1
collective	120	1	2013	20	20.89		20.89				20.89	0	1		1													0.7637	1
collective	10	1	2012	12	23	21	2				23	0.913043	0.0869565		1																	0.18	1
collective	12	2	2013	16	230	60	170				230	0.26087	0.73913						1			0.00011521	1										1
community	13	1	2012	22	17.8374	17.8374					17.8374	1	0		1				1									0.0814977	1							0.0471312	1												1
private	20	1	2013	17	21.15	20.15	1				21.15	0.952719	0.0472813		1				1													0.174899	1			0.0471312	1
collective	19	1	2013	14	1.77	0	1.77				1.77	0	1		1							1.1521e-05	1					0.0633871	1			0.288295	1
private	23	1	2013	19	0.743224		0.743224				0.743224	0	1						1													0.0240246	1
collective/ university	25	1	2013	22	557.418	557.418					557.418	1	0																			48.0492	1							0.13092	1
private	91	1	2013	17	2.076	0	2.076				2.076	0	1						1													0.707284	1
community	92	1	2013	21	18.58	18.58	0				18.58	1	0															0.06546	1			0.369979	1													0.0078552	1
community	93	1	201	21	18.58	18.58	0				18.58	1	0															0.13092	1													0.0471312	1
community	95	1	2013	15	18.58	18.58	0				18.58	1	0															0.19638	1				1
community	96	1	2013	25	16	16	0				16	1	0																			0.320328	1			0.0079179	1
community	97	1	2013	21	18	18	0				18	1	0								1															0.131025	1									0.0237402	1
community	98	1	2013	25	18	18	0				16.2	1	0																			0.22423	1							0.052368	1
community	101	1	2013	21	18	18	0				18	1	0																							0.101908	1
community	102	1	2013	21	15.4	15.4	0				15.4	1	0		1													0.0679277	1
community	103	1	2013	19	15.4	15.4	0				15.4	1	0																			0.587268	1			0.22911	1										1		1
community	104	1	2013	15	17.9	17.9	0				17.9	1	0
community	105	1	2013	21	9	9	0				9	1	0																			0.734085	1			0.026184	1
private	106	1	2013	17	1.34709	0	1.34709				1.34709	0	1						1															0.01035	1
community	12	1	2013	23	4.22	0	4.22				4.22	0	1															0.0760645	1			6.19289e-05	1							0.016365	1
community	13	1	2013	24	4.22	0	4.22				4.22	0	1						1																					0.003273	1
community	14	1	2013	24	4.22	0	4.22				4.22	0	1						1																					0.003273	1
community	15	1	2013	19	18	18	0				18	1	0			0.0205728	1											0.0227291	1
private	16	1	2013	19	34.74	34.74	0				34.74	1	0																							0.142522	1									0.0087282	1
community	17	1	2013	19	8.69	8.69	0				8.69	1	0															0.0981884	1
community	18	1	2013	17	18	18	0				18	1	0															0.0653727	1											0.17456	1
community	19	1	2013	20	18	18	0				18	1	0																							0.0873498	1			0.0052368	1
community	20	1	2013	17	18	18	0				18	1	0				1		1			1.3092e-05	1
community/ buisness	21	1	2013	17	172.8	172.8	0				172.8	1	0	0.282787	1													1.91471	1																			0.0453866	1
private	22	1	2013	17	4.92	4.92	0				4.92	1	0
community	23	1	2013	21	18	18	0				18	1	0															0.0814977	1			0.0960984	1		1					0.26184	1
private	24	1	2013	24	2.57	2.34	0.23				2.57	0.910506	0.0894942		1				1																	0.06546	1
private	25	1	2013	24	7.4	5.88	1.52				7.4	0.794595	0.205405																							0.06546	1
private	26	1	2013	23	1.97	0	1.97				1.97	0	1																							0.0436749	1
private	27	1	2013	26	2.5	2.5	0				2.5	1	0		1				1													1.28131	1													0.0178055	1
private	28	1	2013	20	11.2	11.2	0				11.2	1	0																			0.0640656	1			0.06546	1
private	32	1	2013	no end date yet	15	5	10				3.75	0.333333	0.666667		1																							0.0363667	1
community	38	1	2013	15	9	9	0				9	1	0						1																	0.0655124	1
private	39	1	2013	20	5.34	4.08	1.26				5.34	0.764045	0.235955				1		1													0.480492	1
community	40	1	2013	20	18	18	0				18	1	0																									0.13092	1
community	41	1	2013	22	18.72	18.72	0				18.72	1	0															0.244493	1
private	42	1	2013	18	25.26	25.26	0				25.26	1	0																			0.480492	1							0.0178051	1
community	43	1	2013	18	9	9	0				9	1	0						1																													0.0890276	1
private	44	1	2013	20	17.89	17.89	0				17.89	1	0															0.0245475	1																	0.00654615	1
community	45	1	2013	21	36	36	0				36	1	0															0.0814977	1											0.009819	1
community	46	1	2013	22	18	18	0				18	1	0															0.038185	1			1.60164	1
community	47	1	2013	21	18	18	0				18	1	0						1									0.026184	1
community	49	1	2013	16	18	18	0				18	1	0																	0.17456	1					0.0436749	1									0.0261846	1
community	50	1	2013	17	18	18	0				18	1	0																	0.17456	1
community	51	3	2012	18	60	60	0				60	1	0																	0.08728	1					1.31025	1
private	52	1	2013	15	27.36	27.36	0				27.36	1	0																							0.0655124	1
community	53	1	2013	15	18	18	0				18	1	0																	0.17456	1
private	54	1	2013	17	151.19	151.19	0				151.19	1	0																			8.15235	1
private	56	1	2013	18	5.5	0	5.5				5.5	0	1										1		1									0.207	1					0.26184	1
private	57	1	2013	16	2	0	2				2	0	1															0.0407489	1					0.207	1
private	58	1	2013	20	15.34	13.37	1.97				15.34	0.871578	0.128422						1													0.15616	1
collective	59	3	2013	19	63.44	63.44	0				63.44	1	0						1
private	63	1	2013	18	16.78	16.78	0				16.78	1	0																			0.672689	1
private	64	1	2013	18	1.63	0.96	0.67				1.63	0.588957	0.411043			0.0235656	1		1
private	65	1	2013	12	30	30	0				30	1	0																			3.20328	1							0.009819	1
private	67	1	2013	18	6.12	6.12	0				6.12	1	0						1																	0.03273	1
private	68	1	2013		9	7	2				2.7	0.777778	0.222222
private	71	1	2013	21	13	13	0				13	1	0						1																											0.130923	1
private	72	1	2013	18	7.364	7.2	0.164				7.364	0.977729	0.0222705			0.0028366	1															0.081	1
private	75	1	2013	13	0.5109	0	0.510966				0.40872	0	1
private	76	1	2013	16	8.43	7	1.43				8.43	0.830368	0.169632		1	0.000837888	1		1													0.160164	1
private	77	1	2013	18	5.23	0	5.23				5.23	0	1						1													0.147351	1
community	79	1	2013	24	18.58	18.58	0				18.58	1	0														1
community	80	1	2013	12	18.58	18.58	0				18.58	1	0															0.104736	1					0.092	1	0.3273	1
community	81	1	2013	21	18.58	18.58	0				18.58	1	0															0.026184	1			0.813633	1							0.00593068	1
community	82	1	2013	16	16.72	16.72	0				16.72	1	0																							0.054943							1
community	83	1	2013	14	16.72	16.72	0				16.72	1	0																							0.19638	1
community	84	1	2013	14	16.72	16.72	0				16.72	1	0																							0.13092	1
community	85	1	2013	17	13.38	13.38	0				13.38	1	0															0.0814977	1							0.03273	1
community	86	1	2013	22	13.38	13.38	0				13.38	1	0			0.0314208	1																			0.026184	1			0.0178051	1	0.018222	1
community	87	1	2013	21	18	18	0				17.28	1	0						1																					0.00890256	1
community	88	1	2013	22	9	9	0				9	1	0																							0.078552	1			0.00890256	1
community	89	1	2013	20	18	18	0				18	1	0						1																	0.06546	1
private	5	1	2013	don't have end date	6.975	6.975	0				6.975	1	0														1									0.26184	1
community	6	1	2013	24	17.8374	17.8374	0				17.8374	1	0																			0.00960984	1
community	7	1	2013	19	16.92	16.92	0				16.92	1	0																																	0.00395895	1
community	8	1	2013	17	16.92	16.92	0				16.92	1	0																											0.039276	1
community	9	1	2013	21	16.92	16.92	0				16.92	1	0								1											0.192197	1									0.210129	1
community	10	1	2013	22	17.8374	17.8374	0				17.8374	1	0																			1.42845	1
community	11	1	2012	20	17.8374	17.8374	0				17.8374	1	0
collective	0	1	2013	21	10.57	0	10.57				10.57	0	1		1				1				1		1			1.3583	1				1
[truncated: 37 more columns]
